# Supplementary material
Source: PubMed Central journal article supplement (PMC2824025)

## **Supplementary Results**

Figure S1: Attentional blink 'curves' as a function of age group and action video game playing

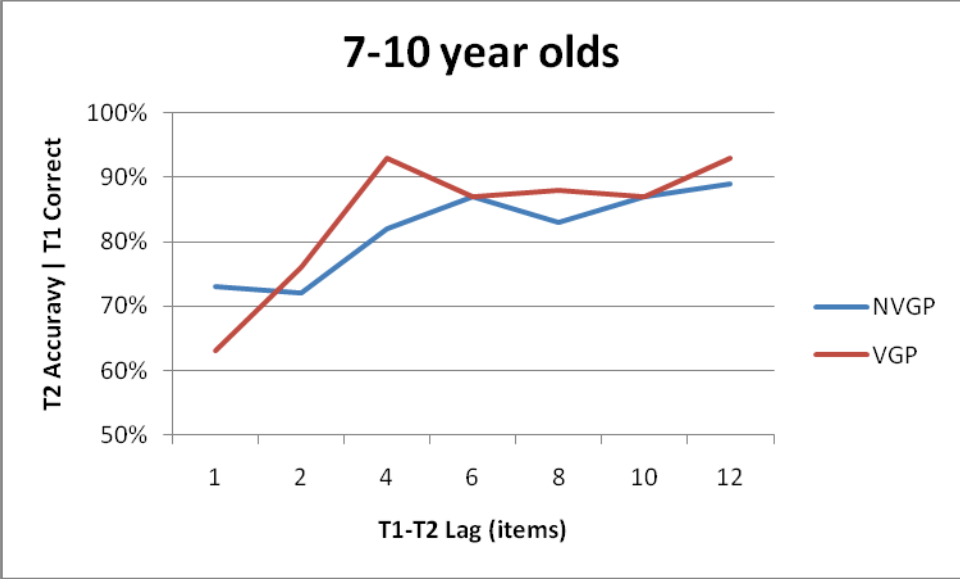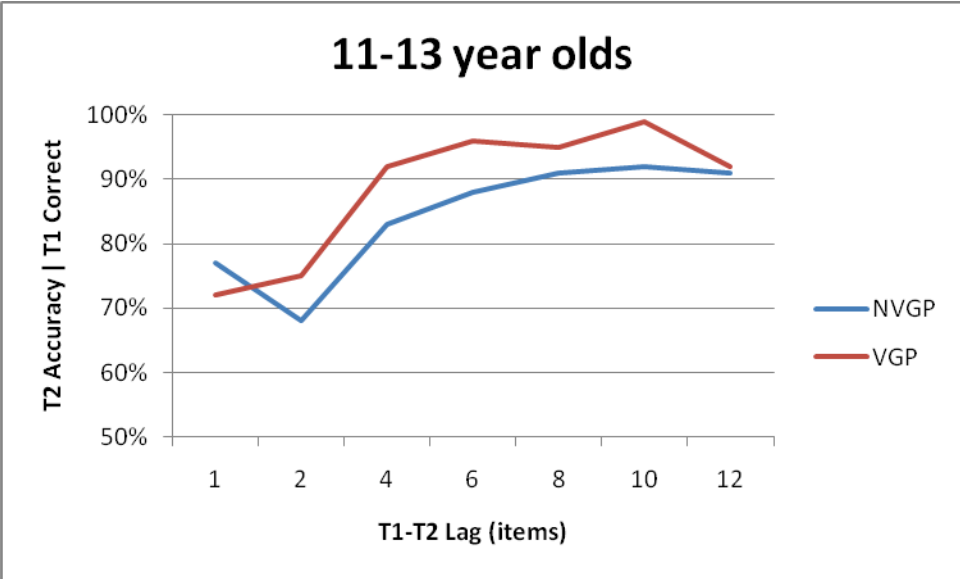

### 14-17 year olds

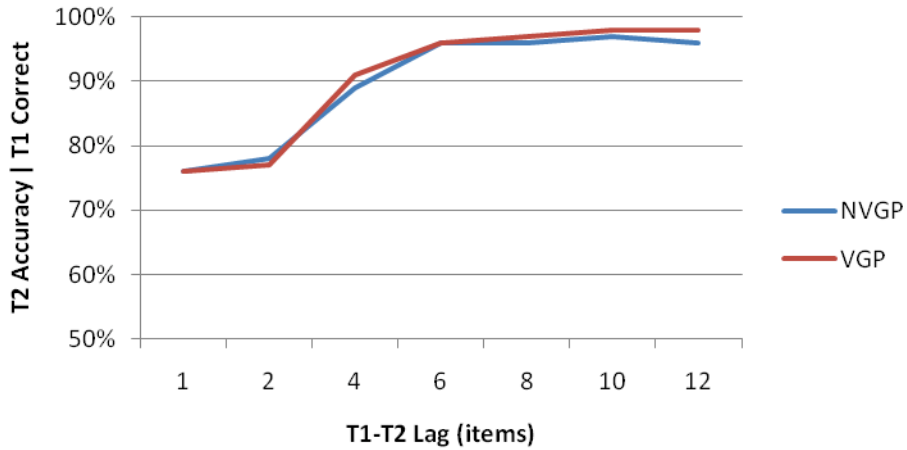

### 18-22 year olds

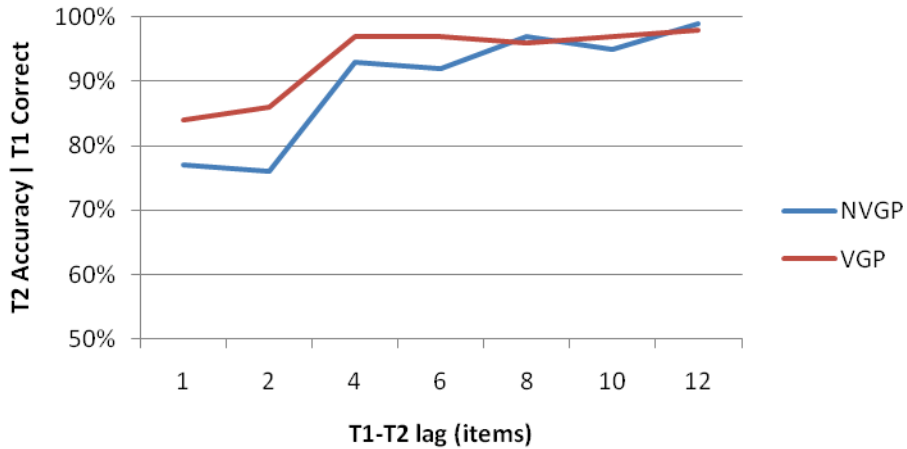

Supplement: NIHMS153973-supplement-01.pdf [file NIHMS153973-supplement-01.pdf]
